# Supplementary material for: Flow-driven enhancement of neodymium and dysprosium separation from aqueous solutions
Source: Royal Society of Chemistry journal article supplement (doi:10.1039/d3su00403a), 2024-01-01
Supplement: d3su00403a2.pdf [file d3su00403a2.pdf]

## Supplementary information

# Flow-driven enhancement of neodymium and dysprosium separation from aqueous solutions

Qingpu Wang<sup>a</sup> and Chinmayee V. Subban<sup>\*ab</sup>

a. Energy and Environment Directorate, Pacific Northwest National Laboratory, Seattle, Washington 98109, United States.

b. Department of Materials Science and Engineering, University of Washington, Seattle, Washington 98195, United States.

E-mail: [chinmayee.subban@pnnl.gov](mailto:chinmayee.subban@pnnl.gov)

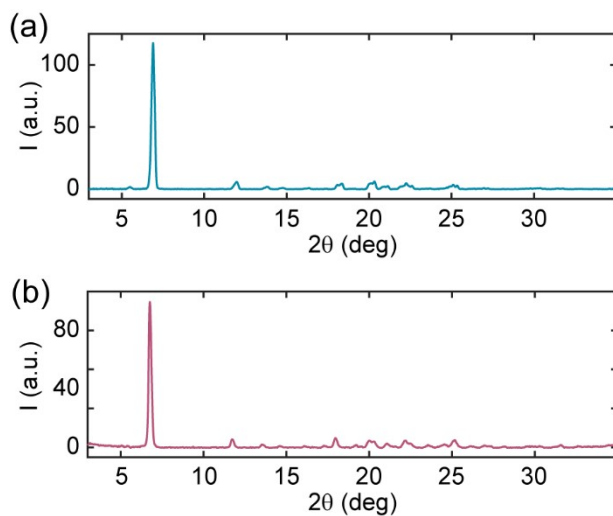

**Fig. S1** Powder XRD patterns the pure  $\text{Nd}(\text{DBP})_3$  (a) and  $\text{Dy}(\text{DBP})_3$  (b) precipitates obtained using BMM. In these experiments, 5 mL of 12 mM NaDBP were added to 5 mL 4 mM  $\text{NdCl}_3$  or  $\text{DyCl}_3$ , and then stirred for 45 min at room temperature.

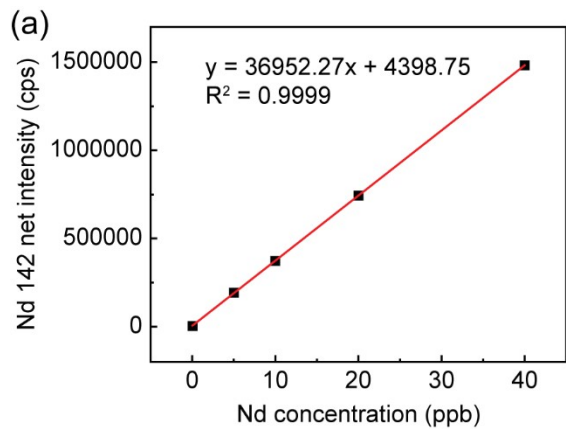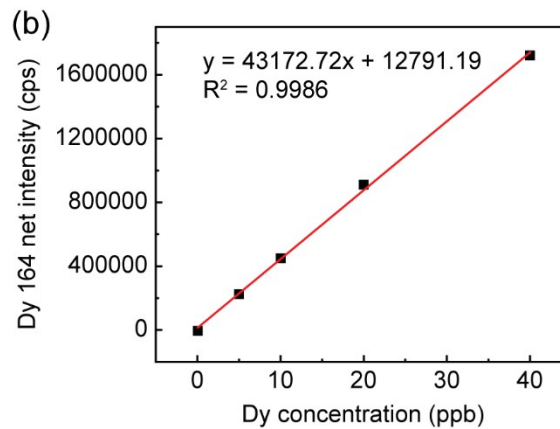

**Fig. S2** ICP-MS calibration curves for Nd(a) and Dy(b). The concentrations of the standard solutions were 0.05, 5, 10, 20, and 40 ppb, respectively. The red lines are linear fits.

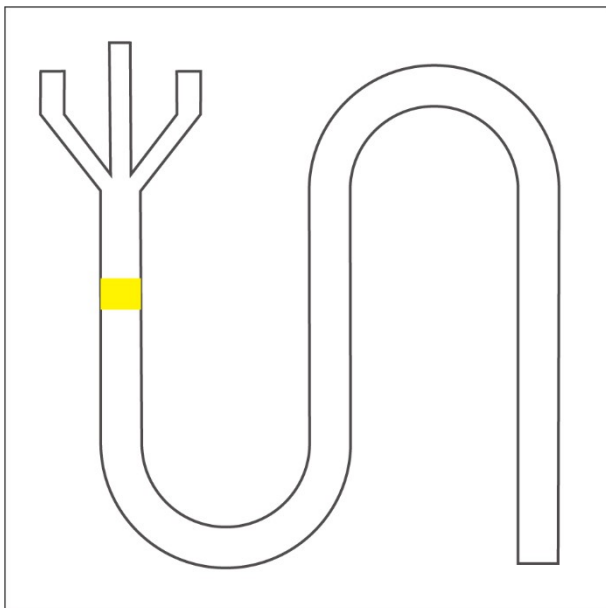

**Fig. S3** Location where the time-lapse data were collected.

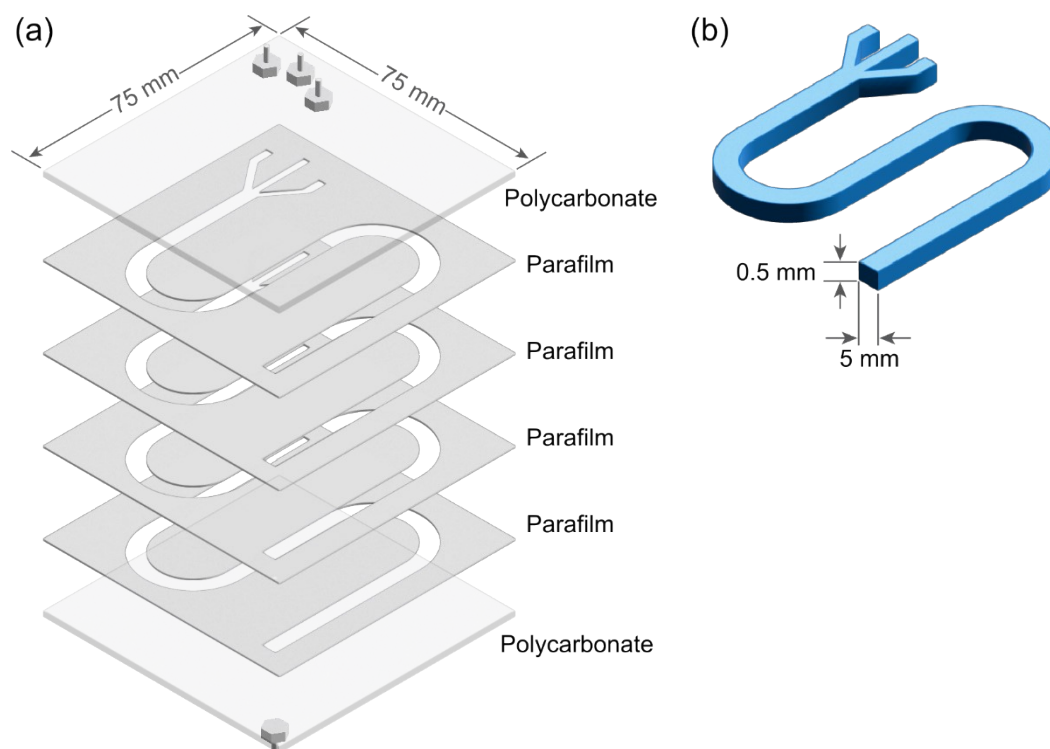

**Fig. S4** Schematics of the flow device for separation. (a) Deconstructed view. (b) Reaction chamber with four layers of parafilm.

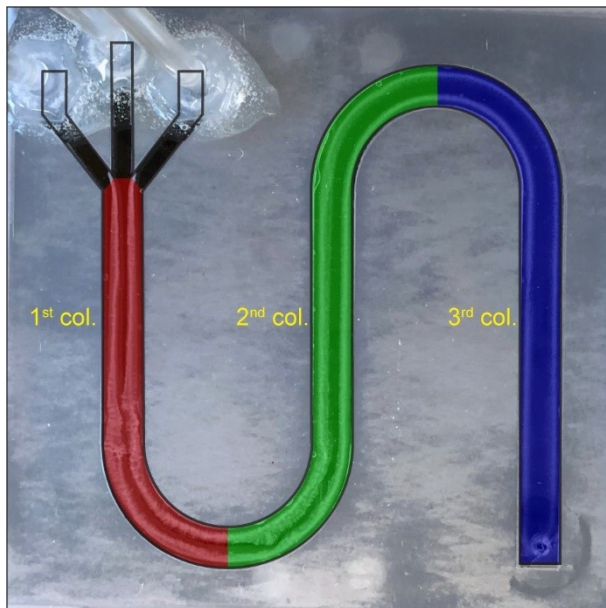

**Fig. S5** Definition of the column numbers.

**Table S1.** Crystallite sizes of Nd(DBP)<sub>3</sub> and Dy(DBP)<sub>3</sub> precipitates obtained by LCM and BMM. The values were calculated using the Scherrer equation. The instrumental broadening was obtained using the XRD pattern of a LaB<sub>6</sub> standard.

| Method | Nd(DBP) <sub>3</sub><br>(Å) | Dy(DBP) <sub>3</sub><br>(Å) |
|--------|-----------------------------|-----------------------------|
| LCM    | 1620.8                      | 757.7                       |
| BMM    | 511.5                       | 779.2                       |

**Table S2.** Saturation indices (SI) for Nd(DBP)<sub>3</sub> and Dy(DBP)<sub>3</sub> at different concentration conditions.

| [NdCl <sub>3</sub> ]<br>(mM) | [DyCl <sub>3</sub> ]<br>(mM) | [NaDBP] (mM) | SI for Nd(DBP) <sub>3</sub> | SI for Dy(DBP) <sub>3</sub> |
|------------------------------|------------------------------|--------------|-----------------------------|-----------------------------|
| 4                            | 4                            | 120          | 8.7                         | 12.4                        |
| 4                            | 4                            | 36           | 7.2                         | 10.8                        |
| 4                            | 4                            | 12           | 5.7                         | 9.4                         |
| 4                            | 4                            | 4            | 4.3                         | 7.9                         |
| 4                            | 4                            | 1.2          | 2.7                         | 6.4                         |
| 4                            | 9.33                         | 1.2          | 2.7                         | 6.7                         |
| 4                            | 1                            | 1.2          | 2.7                         | 5.8                         |



**Movie S1.** Time-lapse movie showing precipitation formation in the microfluidic device for different NaDBP concentrations. In these experiments, the middle subchannel contained 1.2-120 mM NaDBP, while solutions of 4 mM NdCl<sub>3</sub> and 4 mM DyCl<sub>3</sub> were on the sides.
